# Supplementary material
Source: PubMed Central journal article supplement (PMC5209589)
Supplement: supp_kww182_kww182KimWebMaterialFinal.pdf [file supp_kww182_kww182KimWebMaterialFinal.pdf]

**Web Table 1.** Hazard Ratios for the Association Between Optimism and All-Cause Mortality, Excluding Anyone With Prior CVD or Cancer at Baseline in 2004

|                                                           | Optimism   |                   |                   |                   | p-trend |
|-----------------------------------------------------------|------------|-------------------|-------------------|-------------------|---------|
|                                                           | Quartile 1 | Quartile 2        | Quartile 3        | Quartile 4        |         |
|                                                           | Cases      |                   |                   |                   |         |
|                                                           | 2,620      | 1,945             | 1,357             | 890               |         |
| Person-years                                              | 125,171    | 123,236           | 111,514           | 80,328            |         |
| Model                                                     |            |                   |                   |                   |         |
| Demographic <sup>†</sup>                                  | reference  | 0.85 (0.80, 0.90) | 0.76 (0.71, 0.81) | 0.73 (0.67, 0.79) | <0.001  |
| Demographic <sup>†</sup> + Depression <sup>‡</sup>        | reference  | 0.87 (0.82, 0.93) | 0.79 (0.74, 0.85) | 0.76 (0.70, 0.82) | <0.001  |
| Demographic <sup>†</sup> + Health Conditions <sup>§</sup> | reference  | 0.86 (0.81, 0.91) | 0.78 (0.73, 0.83) | 0.74 (0.68, 0.80) | <0.001  |
| Demographic <sup>†</sup> + Health Behaviors <sup>¶</sup>  | reference  | 0.94 (0.89, 1.00) | 0.90 (0.84, 0.96) | 0.87 (0.81, 0.94) | <0.001  |
| All covariates                                            | reference  | 0.97 (0.91, 1.03) | 0.93 (0.87, 0.99) | 0.91 (0.84, 0.99) | 0.007   |

<sup>†</sup>Demographic factors: age, race, marital status, nurses' education, husband's education, father's occupation at age 16

<sup>‡</sup>Depression model: Demographic factors + depression

<sup>§</sup>Health conditions: Demographic model + high cholesterol, hypertension, diabetes, MI, stroke, cancer, BMI

<sup>¶</sup>Health behaviors: Demographic factors + smoking status, physical activity, alcohol consumption, physical examination for screening purposes, diet (AHEI)

**Web Table 2.** Hazard Ratios for the Association Between Optimism and Cause-Specific Mortality, Excluding Anyone with the Condition in Question At Baseline\*

|                                                        | Optimism   |                   |                   |                   | p-trend |
|--------------------------------------------------------|------------|-------------------|-------------------|-------------------|---------|
|                                                        | Quartile 1 | Quartile 2        | Quartile 3        | Quartile 4        |         |
| <b>Heart disease*<sup>†</sup></b><br>(# of deaths=842) | reference  | 0.78 (0.66, 0.92) | 0.66 (0.55, 0.80) | 0.68 (0.54, 0.85) | <0.001  |
| <b>Stroke*<sup>‡</sup></b><br>(# of deaths=328)        | reference  | 0.88 (0.67, 1.14) | 0.91 (0.68, 1.22) | 0.60 (0.41, 0.88) | 0.036   |
| <b>Cancer*<sup>§</sup></b><br>(# of deaths=1,937)      | reference  | 0.96 (0.86, 1.08) | 0.89 (0.78, 1.01) | 0.85 (0.74, 0.98) | 0.014   |

\*Adjusted for: age, race, marital status, nurses' education, husband's education, father's occupation at age 16

\*Women who died within 2-years of baseline (initial assessment of optimism) were excluded from the sample

<sup>†</sup>1,952 excluded from analyses due to presence of heart disease at baseline

<sup>‡</sup>1,888 excluded from analyses due to prior stroke at baseline

<sup>§</sup>6,837 excluded from analyses due to presence of cancer at baseline
